# Supplementary material for: Characteristics of a Series of Three Bacteriophages Infecting Salmonella enterica Strains
Source: Int J Mol Sci. 2020 Aug 26;21(17):6152. doi: 10.3390/ijms21176152 (PMC7503781; doi:10.3390/ijms21176152)
Supplement: Supplementary file 1 [file ijms-21-06152-s001.zip]

Archive with 12 entries (12 files):
- SEN-KKK-Legends to Supplementary Figures-R1.pdf
- SEN-KKK-Suppl-Figure S1-R1.jpg
- SEN-KKK-Suppl-Figure S2-R1.jpg
- SEN-KKK-Suppl-Figure S3-R1.jpg
- SEN-KKK-Suppl-Figure S4-R1.jpg
- SEN-KKK-Suppl-Figure S5-R1.jpg
- SEN-KKK-Suppl-Figure S6-R1.jpg
- SEN-KKK-Suppl-Figure S7-R1.jpg
- SEN-KKK-Suppl-Figure S8-R1.jpg
- SEN-KKK-Suppl-Figure S9-R1.jpg
- SEN-KKK-Table-S1-R1.pdf
- SEN-KKK-Table-S2-R1.pdf
