# Supplementary material for: Characteristics of a Series of Three Bacteriophages Infecting Salmonella enterica Strains
Source: Int J Mol Sci. 2020 Aug 26;21(17):6152. doi: 10.3390/ijms21176152 (PMC7503781; doi:10.3390/ijms21176152)
Supplement: Supplementary file 1 [file ijms-21-06152-s001.zip › SEN-KKK-Legends to Supplementary Figures-R1.pdf]

## Supplementary Material

### Legends to Supplementary Figures

**Figure S1.** Electron micrographs of phages vB\_SenM-1 (A), vB\_SenM-2 (B) and vB\_SenS-3 (C). Scale bars represent 50 nM.

**Figure S2.** Changes in PFU/ml values of phages vB\_SenM-1 (closed circles), vB\_SenM-2 (open squares) and vB\_SenS-3 (open triangles) after infection of bacterial cultures of *S. Typhimurium* (A, B) and *S. Enteritidis* (C, D) at m.o.i=1. Mean values from three independent experiments are shown, with error bars representing SD.

**Figure S3.** Changes in PFU/ml values of phages vB\_SenM-1 (closed circles), vB\_SenM-2 (open squares) and vB\_SenS-3 (open triangles) after infection of bacterial cultures of *S. Typhimurium* (A, B) and *S. Enteritidis* (C, D) at m.o.i=0.5. Mean values from three independent experiments are shown, with error bars representing SD.

**Figure S4.** Changes in PFU/ml values of phages vB\_SenM-1 (closed circles), vB\_SenM-2 (open squares) and vB\_SenS-3 (open triangles) after infection of bacterial cultures of *S. Typhimurium* (A, B) and *S. Enteritidis* (C, D) at m.o.i=0.1. Mean values from three independent experiments are shown, with error bars representing SD.

**Figure S5.** Changes in CFU/ml values of cultures of *S. Typhimurium* (A, B) and *S. Enteritidis* (C, D) infected with phages vB\_SenM-1 (closed circles), vB\_SenM-2 (open squares) and vB\_SenS-3 (closed triangles) at m.o.i=0.5, compared with uninfected control (closed squares). Mean values from three independent experiments shown, with error bars representing SD.

**Figure S6.** Changes in CFU/ml values of bacterial cultures of *S. Typhimurium* (A, B) and *S. Enteritidis* (C, D) infected with phages vB\_SenM-1 (closed circles), vB\_SenM-2 (open squares) and vB\_SenS-3 (closed triangles) at m.o.i=0.1, compared with uninfected control (closed squares). Mean values from three independent experiments are shown, with error bars representing SD.

**Figure S7.** Lysis profile of *S. Typhimurium* (A, B) and *S. Enteritidis* (C, D) infected with phages vB\_SenM-1 (closed circles), vB\_SenM-2 (open squares) and vB\_SenS-3 (open triangles) at m.o.i=1 compared with uninfected control (closed squares). Mean values from three independent experiments are shown, with error bars representing SD.

**Figure S8.** Lysis profile of *S. Typhimurium* (A, B) and *S. Enteritidis* (C, D) infected with phages vB\_SenM-1 (closed circles), vB\_SenM-2 (open squares) and vB\_SenS-3 (open triangles) at m.o.i=0.5 compared with uninfected control (closed squares). Mean values from three independent experiments are shown, with error bars representing SD.

**Figure S9.** Lysis profile of *S. Typhimurium* (A, B) and *S. Enteritidis* (C, D) infected with phages vB\_SenM-1 (closed circles), vB\_SenM-2 (open squares) and vB\_SenS-3 (open triangles) at m.o.i=0.1 compared with uninfected control (closed squares). Mean values from three independent experiments are shown, with error bars representing SD.
