# Supplementary material for: Characteristics of a Series of Three Bacteriophages Infecting Salmonella enterica Strains
Source: Int J Mol Sci. 2020 Aug 26;21(17):6152. doi: 10.3390/ijms21176152 (PMC7503781; doi:10.3390/ijms21176152)
Supplement: Supplementary file 1 [file ijms-21-06152-s001.zip › SEN-KKK-Table-S1-R1.pdf]

Table S1. Genome annotations of phage vB\_SenM-1

| <b>Locus_tag</b> | <b>Start</b> | <b>Stop</b> | <b>Strand</b> | <b>Product</b>                     |
|------------------|--------------|-------------|---------------|------------------------------------|
| vB_SenM-1_01     | 634          | 2           | -             | Similar to hypothetical protein    |
| vB_SenM-1_02     | 1549         | 665         | -             | Thymidylate synthase (EC 2.1.1.45) |
| vB_SenM-1_03     | 2142         | 1549        | -             | Cof hydrolase                      |
| vB_SenM-1_04     | 2527         | 2129        | -             | hypothetical protein               |
| vB_SenM-1_05     | 2679         | 2590        | -             | hypothetical protein               |
| vB_SenM-1_06     | 2944         | 2822        | -             | hypothetical protein               |
| vB_SenM-1_07     | 3102         | 3010        | -             | hypothetical protein               |
| vB_SenM-1_08     | 3191         | 3099        | -             | hypothetical protein               |
| vB_SenM-1_09     | 3729         | 3202        | -             | hypothetical protein               |
| vB_SenM-1_10     | 3997         | 3776        | -             | hypothetical protein               |
| vB_SenM-1_11     | 5654         | 3984        | -             | superfamily II helicase            |
| vB_SenM-1_12     | 6591         | 5713        | -             | hypothetical protein               |
| vB_SenM-1_13     | 7060         | 6575        | -             | deoxycytidylate deaminase          |
| vB_SenM-1_14     | 7667         | 7122        | -             | hypothetical protein               |
| vB_SenM-1_15     | 8659         | 7775        | -             | ATP-binding protein                |
| vB_SenM-1_16     | 8889         | 8659        | -             | hypothetical protein               |
| vB_SenM-1_17     | 9396         | 8950        | -             | hypothetical protein               |
| vB_SenM-1_18     | 10347        | 9445        | -             | hypothetical protein               |
| vB_SenM-1_19     | 10752        | 10462       | -             | hypothetical protein               |
| vB_SenM-1_20     | 10855        | 10754       | -             | hypothetical protein               |
| vB_SenM-1_21     | 11177        | 10830       | -             | hypothetical protein               |
| vB_SenM-1_22     | 11671        | 11222       | -             | hypothetical protein               |
| vB_SenM-1_23     | 11728        | 11934       | +             | hypothetical protein               |

|              |       |       |   |                      |
|--------------|-------|-------|---|----------------------|
| vB_SenM-1_24 | 12286 | 11945 | - | hypothetical protein |
| vB_SenM-1_25 | 12804 | 12283 | - | hypothetical protein |
| vB_SenM-1_26 | 12874 | 13206 | + | hypothetical protein |
| vB_SenM-1_27 | 13181 | 15715 | + | DNA primase/helicase |
| vB_SenM-1_28 | 15876 | 16040 | + | hypothetical protein |
| vB_SenM-1_29 | 16042 | 16146 | + | hypothetical protein |
| vB_SenM-1_30 | 16213 | 16644 | + | hypothetical protein |
| vB_SenM-1_31 | 16681 | 16779 | + | hypothetical protein |
| vB_SenM-1_32 | 16802 | 17083 | + | hypothetical protein |
| vB_SenM-1_33 | 17225 | 17058 | - | hypothetical protein |
| vB_SenM-1_34 | 17362 | 17237 | - | hypothetical protein |
| vB_SenM-1_35 | 17723 | 17424 | - | hypothetical protein |
| vB_SenM-1_36 | 17981 | 17781 | - | hypothetical protein |
| vB_SenM-1_37 | 18370 | 17981 | - | hypothetical protein |
| vB_SenM-1_38 | 18612 | 18439 | - | hypothetical protein |
| vB_SenM-1_39 | 18866 | 18609 | - | hypothetical protein |
| vB_SenM-1_40 | 19030 | 18872 | - | hypothetical protein |
| vB_SenM-1_41 | 19665 | 19096 | - | hypothetical protein |
| vB_SenM-1_42 | 19898 | 19761 | - | hypothetical protein |
| vB_SenM-1_43 | 20216 | 20115 | - | hypothetical protein |
| vB_SenM-1_44 | 20304 | 20200 | - | hypothetical protein |
| vB_SenM-1_45 | 20461 | 20601 | + | hypothetical protein |
| vB_SenM-1_46 | 20586 | 20705 | + | hypothetical protein |
| vB_SenM-1_47 | 20748 | 21230 | + | hypothetical protein |

|              |       |       |   |                              |
|--------------|-------|-------|---|------------------------------|
| vB_SenM-1_48 | 21244 | 21897 | + | dihydrofolate reductase      |
| vB_SenM-1_49 | 21894 | 22400 | + | guanylate kinase             |
| vB_SenM-1_50 | 22397 | 23107 | + | hypothetical protein         |
| vB_SenM-1_51 | 23107 | 23397 | + | hypothetical protein         |
| vB_SenM-1_52 | 23575 | 23865 | + | hypothetical protein         |
| vB_SenM-1_53 | 23869 | 25317 | + | terminase large subunit      |
| vB_SenM-1_54 | 25319 | 26881 | + | portal protein               |
| vB_SenM-1_55 | 26921 | 27022 | + | hypothetical protein         |
| vB_SenM-1_56 | 27059 | 27772 | + | scaffold protein             |
| vB_SenM-1_57 | 28864 | 27779 | - | hypothetical protein         |
| vB_SenM-1_58 | 28858 | 29358 | + | hypothetical protein         |
| vB_SenM-1_59 | 29358 | 29846 | + | hypothetical protein         |
| vB_SenM-1_60 | 29846 | 30223 | + | hypothetical protein         |
| vB_SenM-1_61 | 30147 | 30674 | + | hypothetical protein         |
| vB_SenM-1_62 | 30674 | 31297 | + | putative tail fibers protein |
| vB_SenM-1_63 | 31297 | 34254 | + | tail formation protein GpI   |
| vB_SenM-1_64 | 34322 | 34960 | + | hypothetical protein         |
| vB_SenM-1_65 | 34972 | 36861 | + | major tail protein           |
| vB_SenM-1_66 | 36948 | 38087 | + | hypothetical protein         |
| vB_SenM-1_67 | 38099 | 38530 | + | hypothetical protein         |
| vB_SenM-1_68 | 38549 | 38977 | + | hypothetical protein         |
| vB_SenM-1_69 | 39046 | 39159 | + | hypothetical protein         |
| vB_SenM-1_70 | 39140 | 40801 | + | tail tape measure protein    |
| vB_SenM-1_71 | 40798 | 41694 | + | hypothetical protein         |

|              |       |       |   |                                    |
|--------------|-------|-------|---|------------------------------------|
| vB_SenM-1_72 | 41737 | 41844 | + | hypothetical protein               |
| vB_SenM-1_73 | 42007 | 42987 | + | hypothetical protein               |
| vB_SenM-1_74 | 42987 | 43634 | + | translation initiation factor IF-2 |
| vB_SenM-1_75 | 43645 | 44016 | + | hypothetical protein               |
| vB_SenM-1_76 | 44016 | 45188 | + | hypothetical protein               |
| vB_SenM-1_77 | 45175 | 45834 | + | hypothetical protein               |
| vB_SenM-1_78 | 45821 | 47161 | + | tail fiber protein                 |
| vB_SenM-1_79 | 47170 | 47712 | + | putative tail fibers protein       |
| vB_SenM-1_80 | 47716 | 48219 | + | putative tail fibers protein       |
| vB_SenM-1_81 | 48322 | 48582 | + | hypothetical protein               |
| vB_SenM-1_82 | 48626 | 49102 | + | lysozyme R (EC 3.2.1.17)           |
| vB_SenM-1_83 | 49081 | 49410 | + | hypothetical protein               |
| vB_SenM-1_84 | 49355 | 49612 | + | hypothetical protein               |
| vB_SenM-1_85 | 49852 | 49628 | - | hypothetical protein               |
| vB_SenM-1_86 | 50127 | 49852 | - | hypothetical protein               |
| vB_SenM-1_87 | 52110 | 50143 | - | DNA polymerase I (EC 2.7.7.7)      |
| vB_SenM-1_88 | 52427 | 52110 | - | DNA polymerase beta subunit        |
