# Supplementary material for: Characteristics of a Series of Three Bacteriophages Infecting Salmonella enterica Strains
Source: Int J Mol Sci. 2020 Aug 26;21(17):6152. doi: 10.3390/ijms21176152 (PMC7503781; doi:10.3390/ijms21176152)
Supplement: Supplementary file 1 [file ijms-21-06152-s001.zip › SEN-KKK-Table-S2-R1.pdf]

Table S2. Genome annotations of phage vB\_SenS-3

| <b>Locus tag</b> | <b>Start</b> | <b>Stop</b> | <b>Strand</b> | <b>Product</b>                     |
|------------------|--------------|-------------|---------------|------------------------------------|
| vB_SenS-3_01     | 844          | 122         | -             | deoxynucleoside-5'-monophosphatase |
| vB_SenS-3_02     | 1319         | 924         | -             | hypothetical protein               |
| vB_SenS-3_03     | 1604         | 1362        | -             | hypothetical protein               |
| vB_SenS-3_04     | 3322         | 1658        | -             | putative A1 protein                |
| vB_SenS-3_05     | 3658         | 3431        | -             | hypothetical protein               |
| vB_SenS-3_06     | 4124         | 3708        | -             | A2 protein                         |
| vB_SenS-3_07     | 4662         | 4411        | -             | hypothetical protein               |
| vB_SenS-3_08     | 4681         | 4782        | +             | hypothetical protein               |
| vB_SenS-3_09     | 4910         | 5056        | +             | hypothetical protein               |
| vB_SenS-3_10     | 5121         | 5246        | +             | hypothetical protein               |
| vB_SenS-3_11     | 5367         | 5480        | +             | hypothetical protein               |
| vB_SenS-3_12     | 6119         | 5874        | -             | hypothetical protein               |
| vB_SenS-3_13     | 6147         | 7148        | +             | hypothetical protein               |
| vB_SenS-3_14     | 7268         | 7417        | +             | putative membrane protein          |
| vB_SenS-3_15     | 7420         | 7632        | +             | hypothetical protein               |
| vB_SenS-3_16     | 7634         | 7978        | +             | hypothetical protein               |
| vB_SenS-3_17     | 7975         | 8160        | +             | hypothetical protein               |
| vB_SenS-3_18     | 8153         | 8293        | +             | hypothetical protein               |
| vB_SenS-3_19     | 8284         | 8523        | +             | hypothetical protein               |
| vB_SenS-3_20     | 8676         | 8452        | -             | hypothetical protein               |
| vB_SenS-3_21     | 8895         | 9056        | +             | hypothetical protein               |
| vB_SenS-3_22     | 9103         | 9276        | +             | hypothetical protein               |
| vB_SenS-3_23     | 9357         | 9563        | +             | hypothetical protein               |

|              |       |       |   |                                               |
|--------------|-------|-------|---|-----------------------------------------------|
| vB_SenS-3_24 | 9868  | 9966  | + | hypothetical protein                          |
| vB_SenS-3_25 | 11005 | 10124 | - | hypothetical protein                          |
| vB_SenS-3_26 | 11432 | 11082 | - | hypothetical protein                          |
| vB_SenS-3_27 | 12037 | 11432 | - | hypothetical protein                          |
| vB_SenS-3_28 | 12222 | 12037 | - | putative membrane protein                     |
| vB_SenS-3_29 | 12455 | 12222 | - | hypothetical protein                          |
| vB_SenS-3_30 | 12741 | 12457 | - | hypothetical protein                          |
| vB_SenS-3_31 | 13183 | 12665 | - | hypothetical protein                          |
| vB_SenS-3_32 | 13611 | 13228 | - | capsid and scaffold protein                   |
| vB_SenS-3_33 | 14020 | 13553 | - | hypothetical protein                          |
| vB_SenS-3_34 | 14217 | 14017 | - | putative membrane protein                     |
| vB_SenS-3_35 | 14320 | 14201 | - | hypothetical protein                          |
| vB_SenS-3_36 | 14649 | 14317 | - | hypothetical protein                          |
| vB_SenS-3_37 | 14884 | 14639 | - | putative membrane protein                     |
| vB_SenS-3_38 | 15162 | 14881 | - | putative membrane protein                     |
| vB_SenS-3_39 | 15320 | 15162 | - | hypothetical protein                          |
| vB_SenS-3_40 | 15570 | 15310 | - | hypothetical protein                          |
| vB_SenS-3_41 | 16076 | 15645 | - | hypothetical protein                          |
| vB_SenS-3_42 | 16246 | 16145 | - | hypothetical protein                          |
| vB_SenS-3_43 | 16706 | 16239 | - | HNH homing endonuclease                       |
| vB_SenS-3_44 | 17221 | 16703 | - | phosphoesterase                               |
| vB_SenS-3_45 | 17589 | 17221 | - | hypothetical protein                          |
| vB_SenS-3_46 | 18452 | 17589 | - | putative serine/threonine protein phosphatase |
| vB_SenS-3_47 | 18845 | 18555 | - | thioredoxin                                   |

|              |       |       |   |                                                                                  |
|--------------|-------|-------|---|----------------------------------------------------------------------------------|
| vB_SenS-3_48 | 19248 | 18838 | - | hypothetical protein                                                             |
| vB_SenS-3_49 | 19740 | 19324 | - | putative membrane protein                                                        |
| vB_SenS-3_50 | 20229 | 19816 | - | endolysin                                                                        |
| vB_SenS-3_51 | 20882 | 20226 | - | holin                                                                            |
| vB_SenS-3_52 | 21638 | 21039 | - | ATP-dependent Clp protease proteolytic subunit                                   |
| vB_SenS-3_53 | 22403 | 21651 | - | dNMP kinase                                                                      |
| vB_SenS-3_54 | 22756 | 22403 | - | hypothetical protein                                                             |
| vB_SenS-3_55 | 23136 | 22687 | - | i-spanin                                                                         |
| vB_SenS-3_56 | 23791 | 23093 | - | hypothetical protein                                                             |
| vB_SenS-3_57 | 23908 | 23813 | - | hypothetical protein                                                             |
| vB_SenS-3_58 | 24284 | 23937 | - | putative membrane protein                                                        |
| vB_SenS-3_59 | 24685 | 24401 | - | putative membrane protein                                                        |
| vB_SenS-3_60 | 24978 | 24682 | - | hypothetical protein                                                             |
| vB_SenS-3_61 | 25375 | 24932 | - | hypothetical protein                                                             |
| vB_SenS-3_62 | 25643 | 25344 | - | hypothetical protein                                                             |
| vB_SenS-3_63 | 25915 | 25643 | - | hypothetical protein                                                             |
| vB_SenS-3_64 | 26387 | 25992 | - | hypothetical protein                                                             |
| vB_SenS-3_65 | 26631 | 26446 | - | hypothetical protein                                                             |
| vB_SenS-3_66 | 26857 | 26696 | - | hypothetical protein                                                             |
| vB_SenS-3_67 | 27077 | 26916 | - | hypothetical protein                                                             |
| vB_SenS-3_68 | 27445 | 27077 | - | 2-ketobutyrate formate-lyase (EC 2.3.1.-) @ Pyruvate formate-lyase (EC 2.3.1.54) |
| vB_SenS-3_69 | 27581 | 27423 | - | hypothetical protein                                                             |
| vB_SenS-3_70 | 27713 | 27582 | - | hypothetical protein                                                             |

|              |       |       |   |                      |
|--------------|-------|-------|---|----------------------|
| vB_SenS-3_71 | 27879 | 27682 | - | hypothetical protein |
| vB_SenS-3_72 | 28266 | 28060 | - | hypothetical protein |
| vB_SenS-3_73 | 28559 | 28266 | - | hypothetical protein |
| vB_SenS-3_74 | 28687 | 28580 | - | hypothetical protein |
| vB_SenS-3_75 | 28883 | 28719 | - | hypothetical protein |
| vB_SenS-3_76 | 29097 | 28876 | - | hypothetical protein |
| vB_SenS-3_77 | 29337 | 29179 | - | hypothetical protein |
| vB_SenS-3_78 | 29560 | 29360 | - | hypothetical protein |
| vB_SenS-3_79 | 29744 | 29631 | - | hypothetical protein |
| vB_SenS-3_80 | 29810 | 29914 | + | hypothetical protein |
| vB_SenS-3_81 | 29922 | 30080 | + | hypothetical protein |
| vB_SenS-3_82 | 30384 | 30142 | - | hypothetical protein |
| vB_SenS-3_83 | 30656 | 30480 | - | hypothetical protein |
| vB_SenS-3_84 | 30747 | 30634 | - | hypothetical protein |
| vB_SenS-3_85 | 30979 | 30761 | - | hypothetical protein |
| vB_SenS-3_86 | 31059 | 30967 | - | hypothetical protein |
| vB_SenS-3_87 | 31214 | 31065 | - | hypothetical protein |
| vB_SenS-3_88 | 31795 | 31442 | - | hypothetical protein |
| vB_SenS-3_89 | 32146 | 31982 | - | hypothetical protein |
| vB_SenS-3_90 | 32207 | 32380 | + | hypothetical protein |
| vB_SenS-3_91 | 32413 | 32523 | + | hypothetical protein |
| vB_SenS-3_92 | 32687 | 32562 | - | hypothetical protein |
| vB_SenS-3_93 | 32890 | 32750 | - | hypothetical protein |
| vB_SenS-3_94 | 33646 | 33065 | - | homing endonuclease  |

|               |       |       |   |                                            |
|---------------|-------|-------|---|--------------------------------------------|
| vB_SenS-3_95  | 33835 | 33650 | - | hypothetical protein                       |
| vB_SenS-3_96  | 34051 | 33917 | - | hypothetical protein                       |
| vB_SenS-3_97  | 34243 | 34133 | - | hypothetical protein                       |
| vB_SenS-3_98  | 34440 | 34252 | - | hypothetical protein                       |
| vB_SenS-3_99  | 34762 | 34490 | - | hypothetical protein                       |
| vB_SenS-3_100 | 34782 | 34913 | + | hypothetical protein                       |
| vB_SenS-3_101 | 35138 | 35001 | - | hypothetical protein                       |
| vB_SenS-3_102 | 35571 | 35296 | - | hypothetical protein                       |
| vB_SenS-3_103 | 35933 | 35661 | - | hypothetical protein                       |
| vB_SenS-3_104 | 36138 | 36046 | - | hypothetical protein                       |
| vB_SenS-3_105 | 36367 | 36215 | - | hypothetical protein                       |
| vB_SenS-3_106 | 36936 | 36427 | - | H-N-H-endonuclease F-TfIV                  |
| vB_SenS-3_107 | 37303 | 37007 | - | hypothetical protein                       |
| vB_SenS-3_108 | 38087 | 37410 | - | PnuC-like ribosyl nicotinamide transporter |
| vB_SenS-3_109 | 39195 | 38089 | - | ribosyl nicotinamide kinase                |
| vB_SenS-3_110 | 39312 | 39404 | + | hypothetical protein                       |
| vB_SenS-3_111 | 40352 | 39408 | - | putative SPFH domain-containing protein    |
| vB_SenS-3_112 | 40564 | 40364 | - | hypothetical protein                       |
| vB_SenS-3_113 | 41183 | 40674 | - | hypothetical protein                       |
| vB_SenS-3_114 | 41399 | 41232 | - | hypothetical protein                       |
| vB_SenS-3_115 | 41728 | 41405 | - | hypothetical protein                       |
| vB_SenS-3_116 | 42296 | 41814 | - | Phage-associated homing endonuclease       |
| vB_SenS-3_117 | 42783 | 42340 | - | recombination related exonuclease          |
| vB_SenS-3_118 | 42953 | 42783 | - | hypothetical protein                       |

|               |       |       |   |                                                                            |
|---------------|-------|-------|---|----------------------------------------------------------------------------|
| vB_SenS-3_119 | 43472 | 43023 | - | cell wall hydrolase                                                        |
| vB_SenS-3_120 | 43795 | 43478 | - | hypothetical protein                                                       |
| vB_SenS-3_121 | 44131 | 44024 | - | hypothetical protein                                                       |
| vB_SenS-3_122 | 44883 | 44245 | - | Phage tail fiber protein                                                   |
| vB_SenS-3_123 | 45119 | 44937 | - | hypothetical protein                                                       |
| vB_SenS-3_124 | 45891 | 45190 | - | Metallopeptidase phage-associated                                          |
| vB_SenS-3_125 | 46134 | 45922 | - | hypothetical protein                                                       |
| vB_SenS-3_126 | 46391 | 46176 | - | tail tape measure protein                                                  |
| vB_SenS-3_127 | 46968 | 46453 | - | hypothetical protein                                                       |
| vB_SenS-3_128 | 47330 | 47052 | - | hypothetical protein                                                       |
| vB_SenS-3_129 | 47883 | 47407 | - | Phage ribonuclease H (EC 3.1.26.4)                                         |
| vB_SenS-3_130 | 48152 | 47883 | - | hypothetical protein                                                       |
| vB_SenS-3_131 | 48406 | 48152 | - | hypothetical protein                                                       |
| vB_SenS-3_132 | 48852 | 48499 | - | hypothetical protein                                                       |
| vB_SenS-3_133 | 49710 | 48856 | - | Thymidylate synthase (EC 2.1.1.45)                                         |
| vB_SenS-3_134 | 50237 | 49707 | - | Dihydrofolate reductase phage-associated                                   |
| vB_SenS-3_135 | 51382 | 50237 | - | Ribonucleotide reductase of class Ia (aerobic) beta subunit (EC 1.17.4.1)  |
| vB_SenS-3_136 | 53880 | 51490 | - | Ribonucleotide reductase of class Ia (aerobic) alpha subunit (EC 1.17.4.1) |
| vB_SenS-3_137 | 54186 | 53944 | - | hypothetical protein                                                       |
| vB_SenS-3_138 | 54940 | 54188 | - | Phage phosphate starvation-inducible protein PhoH (ACLAME 589)             |
| vB_SenS-3_139 | 54957 | 55061 | + | hypothetical protein                                                       |
| vB_SenS-3_140 | 55115 | 55258 | + | hypothetical protein                                                       |

|               |       |       |   |                                                                               |
|---------------|-------|-------|---|-------------------------------------------------------------------------------|
| vB_SenS-3_141 | 55296 | 57170 | + | Ribonucleotide reductase of class III (anaerobic) large subunit (EC 1.17.4.2) |
| vB_SenS-3_142 | 57269 | 57550 | + | hypothetical protein                                                          |
| vB_SenS-3_143 | 57560 | 57763 | + | hypothetical protein                                                          |
| vB_SenS-3_144 | 57732 | 57926 | + | hypothetical protein                                                          |
| vB_SenS-3_145 | 57926 | 58777 | + | NAD-dependent protein deacetylase of SIR2 family                              |
| vB_SenS-3_146 | 58755 | 58937 | + | hypothetical protein                                                          |
| vB_SenS-3_147 | 58918 | 59103 | + | hypothetical protein                                                          |
| vB_SenS-3_148 | 59057 | 59596 | + | hypothetical protein                                                          |
| vB_SenS-3_149 | 59635 | 60027 | + | hypothetical protein                                                          |
| vB_SenS-3_150 | 60037 | 60432 | + | hypothetical protein                                                          |
| vB_SenS-3_151 | 60467 | 60568 | + | hypothetical protein                                                          |
| vB_SenS-3_152 | 60829 | 60698 | - | hypothetical protein                                                          |
| vB_SenS-3_153 | 60926 | 63838 | + | DNA primase C                                                                 |
| vB_SenS-3_154 | 63822 | 64055 | + | hypothetical protein                                                          |
| vB_SenS-3_155 | 64124 | 64828 | + | D2 protein                                                                    |
| vB_SenS-3_156 | 64821 | 65075 | + | hypothetical protein                                                          |
| vB_SenS-3_157 | 65183 | 65593 | + | putative D3 protein                                                           |
| vB_SenS-3_158 | 65630 | 65926 | + | hypothetical protein                                                          |
| vB_SenS-3_159 | 65977 | 66285 | + | transcriptional regulator protein                                             |
| vB_SenS-3_160 | 66371 | 66469 | + | hypothetical protein                                                          |
| vB_SenS-3_161 | 66561 | 67535 | + | D DNA ligase phage-associated                                                 |
| vB_SenS-3_162 | 67508 | 67630 | + | hypothetical protein                                                          |
| vB_SenS-3_163 | 67738 | 68517 | + | DNA ligase phage-associated                                                   |
| vB_SenS-3_164 | 68510 | 69277 | + | D5 protein                                                                    |

|               |       |       |   |                                                                |
|---------------|-------|-------|---|----------------------------------------------------------------|
| vB_SenS-3_165 | 69309 | 70832 | + | putative DNA helicase                                          |
| vB_SenS-3_166 | 70829 | 71719 | + | DNA primase/helicase                                           |
| vB_SenS-3_167 | 71782 | 74349 | + | DNA polymerase phage-associated                                |
| vB_SenS-3_168 | 74342 | 74839 | + | hypothetical protein                                           |
| vB_SenS-3_169 | 74836 | 76182 | + | Phage DNA helicase                                             |
| vB_SenS-3_170 | 76184 | 76714 | + | Phage-associated homing endonuclease                           |
| vB_SenS-3_171 | 76880 | 77242 | + | hypothetical protein                                           |
| vB_SenS-3_172 | 77235 | 78008 | + | hypothetical protein                                           |
| vB_SenS-3_173 | 78048 | 79025 | + | Phage-associated recombinase                                   |
| vB_SenS-3_174 | 79006 | 80844 | + | Phage recombination related exonuclease (EC 3.1.11.-)          |
| vB_SenS-3_175 | 80848 | 81330 | + | D14 protein                                                    |
| vB_SenS-3_176 | 81330 | 82205 | + | Phage endonuclease                                             |
| vB_SenS-3_177 | 82202 | 82648 | + | Deoxyuridine 5'-triphosphate nucleotidohydrolase (EC 3.6.1.23) |
| vB_SenS-3_178 | 82711 | 82887 | + | hypothetical protein                                           |
| vB_SenS-3_179 | 83264 | 83055 | - | hypothetical protein                                           |
| vB_SenS-3_180 | 83609 | 83280 | - | hypothetical protein                                           |
| vB_SenS-3_181 | 86032 | 83765 | - | L-shaped tail fiber                                            |
| vB_SenS-3_182 | 86454 | 86032 | - | lateral fiber collar protein                                   |
| vB_SenS-3_183 | 88517 | 86460 | - | tail fiber protein                                             |
| vB_SenS-3_184 | 91367 | 88518 | - | tail fiber protein                                             |
| vB_SenS-3_185 | 91978 | 91364 | - | distal tail protein                                            |
| vB_SenS-3_186 | 95794 | 92087 | - | tail fiber protein                                             |
| vB_SenS-3_187 | 95897 | 95787 | - | hypothetical protein                                           |

|               |        |        |   |                                             |
|---------------|--------|--------|---|---------------------------------------------|
| vB_SenS-3_188 | 96243  | 95875  | - | putative tape measure chaperone             |
| vB_SenS-3_189 | 96709  | 96305  | - | putative tape measure chaperone             |
| vB_SenS-3_190 | 97605  | 96706  | - | tail fiber protein                          |
| vB_SenS-3_191 | 99019  | 97610  | - | major tail protein                          |
| vB_SenS-3_192 | 99531  | 99046  | - | hypothetical protein                        |
| vB_SenS-3_193 | 100302 | 99535  | - | hypothetical protein                        |
| vB_SenS-3_194 | 100814 | 100302 | - | head completion protein                     |
| vB_SenS-3_195 | 102250 | 100874 | - | capsid and scaffold protein                 |
| vB_SenS-3_196 | 102900 | 102268 | - | capsid and scaffold protein                 |
| vB_SenS-3_197 | 103386 | 102904 | - | tail fiber protein                          |
| vB_SenS-3_198 | 104600 | 103383 | - | portal (connector) protein                  |
| vB_SenS-3_199 | 105037 | 104600 | - | putative nicking site-specific endonuclease |
| vB_SenS-3_200 | 106468 | 105152 | - | terminase large subunit                     |
| vB_SenS-3_201 | 106950 | 106468 | - | putative terminase small subunit            |
| vB_SenS-3_202 | 108733 | 106961 | - | receptor-binding tail protein               |
| vB_SenS-3_203 | 108817 | 109083 | + | putative receptor blocking protein          |
| vB_SenS-3_204 | 109158 | 109469 | + | hypothetical protein                        |
| vB_SenS-3_205 | 109542 | 109646 | + | hypothetical protein                        |
| vB_SenS-3_206 | 109646 | 109840 | + | hypothetical protein                        |
| vB_SenS-3_207 | 109833 | 110078 | + | putative membrane protein                   |
| vB_SenS-3_208 | 110977 | 110243 | - | deoxynucleoside-5'-monophosphatase          |
| vB_SenS-3_209 | 111452 | 111057 | - | hypothetical protein                        |
| vB_SenS-3_210 | 111737 | 111495 | - | hypothetical protein                        |
| vB_SenS-3_211 | 113455 | 111791 | - | putative A1 protein                         |

|               |        |        |   |                           |
|---------------|--------|--------|---|---------------------------|
| vB_SenS-3_212 | 113791 | 113564 | - | hypothetical protein      |
| vB_SenS-3_213 | 114259 | 113843 | - | A2 protein                |
| vB_SenS-3_214 | 114797 | 114546 | - | hypothetical protein      |
| vB_SenS-3_215 | 114816 | 114917 | + | hypothetical protein      |
| vB_SenS-3_216 | 115045 | 115191 | + | hypothetical protein      |
| vB_SenS-3_217 | 115256 | 115381 | + | hypothetical protein      |
| vB_SenS-3_218 | 115502 | 115615 | + | hypothetical protein      |
| vB_SenS-3_219 | 116254 | 116009 | - | hypothetical protein      |
| vB_SenS-3_220 | 116282 | 117283 | + | hypothetical protein      |
| vB_SenS-3_221 | 117403 | 117552 | + | putative membrane protein |
| vB_SenS-3_222 | 117555 | 117767 | + | hypothetical protein      |
| vB_SenS-3_223 | 117769 | 118113 | + | hypothetical protein      |
| vB_SenS-3_224 | 118110 | 118295 | + | hypothetical protein      |
| vB_SenS-3_225 | 118288 | 118428 | + | hypothetical protein      |
| vB_SenS-3_226 | 118419 | 118658 | + | hypothetical protein      |
| vB_SenS-3_227 | 118811 | 118587 | - | hypothetical protein      |
| vB_SenS-3_228 | 119030 | 119191 | + | hypothetical protein      |
| vB_SenS-3_229 | 119238 | 119411 | + | hypothetical protein      |
| vB_SenS-3_230 | 119492 | 119585 | + | hypothetical protein      |
